# Supplementary material for: Isomerism control of diethylstilbestrol by metal surface induced O–H cleavage
Source: Royal Society of Chemistry journal article supplement (doi:10.1039/c8cc06632a), 2018-01-01
Supplement: c8cc06632a1.pdf [file c8cc06632a1.pdf]

## Electronic Supplementary Information (ESI)

### Isomerism control of diethylstilbestrol by metal surface induced O-H cleavage

Seung Cheol Oh, Julian A. Lloyd, Sybille Fischer, Özge Sağlam,  
Anthoula C. Papageorgiou, Katharina Diller, David A. Duncan,  
Florian Klappenberger, Francesco Allegretti, Joachim Reichert, and  
Johannes V. Barth

*Physics Department E20, Technical University of Munich, D-85748 Garching, Germany*

#### Contents

|                                                                                                      |     |
|------------------------------------------------------------------------------------------------------|-----|
| Detailed methods . . . . .                                                                           | S-2 |
| Fig. S1: DES XPS signatures on Ag(111) after annealing to 300 K . . . . .                            | S-2 |
| Fig. S2: Surface enantiomers of <i>trans</i> DES . . . . .                                           | S-2 |
| Fig. S3: <i>Shingle motif</i> structure at $\sim 150$ K . . . . .                                    | S-3 |
| Fig. S4: Mobility of supramolecular trimers in <i>windmill motif</i> domains . . . . .               | S-3 |
| Fig. S5: Organisational chirality in <i>windmill motif</i> domains . . . . .                         | S-4 |
| Fig. S6: Identification of single molecules in <i>star motif</i> . . . . .                           | S-4 |
| Fig. S7: O 1s signal of a submonolayer coverage of DES on Cu(111) after annealing to 400 K . . . . . | S-4 |

## Detailed methods

**Sample preparation.** Samples were prepared in two separate ultra high vacuum (UHV) chambers following the same procedures. The single crystal surfaces of Ag(111) and Cu(111) were prepared by cycles of Ar<sup>+</sup> (Linde, 99.999%) sputtering and annealing to ~ 590–723 K and ~ 733–770 K, respectively. Diethylstilbestrol (DES, Sigma, ≥ 99%) was dosed with organic molecular beam epitaxy on the Ag or Cu surfaces by heating of the solid powder to ~ 370–390 K.

**STM.** An Aarhus-type variable-temperature STM (SPECS GmbH) housed in the analysis chamber of a home-made UHV system at  $3 \times 10^{-10}$  mbar base pressure in Garching was employed. The tip consisted of a chemically etched tungsten wire. Measurements were performed in the constant current mode and the tunnelling bias,  $U$ , was applied to the sample. The topography images were processed by the WSxM software.<sup>1</sup>

**XPS.** The measurements were carried out at the HE-SGM dipole beamline at the BESSY II storage ring in Berlin. The base pressure of the end station was  $\sim 1 \times 10^{-9}$  mbar. The excitation energy for the C 1s and O 1s spectral regions was 435 and 680 eV, respectively. Data were collected in normal emission geometry at a sample temperature of ~ 200 K. The binding energy scale of the spectra was calibrated by setting the Ag 3d<sub>5/2</sub> or Cu 3p<sub>3/2</sub> core levels at 368.3 eV or 75.1 eV, respectively. A Shirley background was subtracted from the raw data.

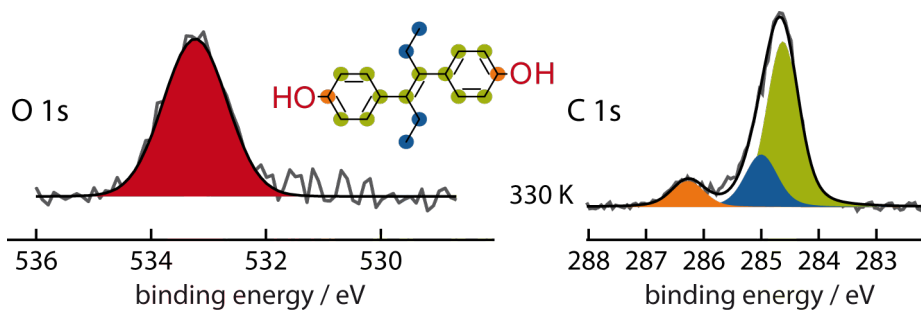

Fig. S1: O 1s and C 1s core levels of a submonolayer coverage of DES on Ag(111) after annealing to 330 K. The inset of the DES structural formula highlights the chemical inequivalent C atoms expected to be distinguished in the C 1s spectra. The same colour code applies to the respective fitted components.

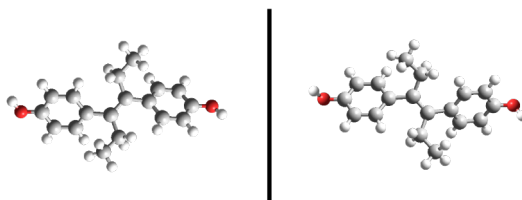

Fig. S2: Surface enantiomers of *trans* DES.

<sup>1</sup>Horcas, I.; Fernández, R.; Gómez-Rodríguez, J. M.; Colchero, J.; Gómez-Herrero, J.; Baro, A. M. *Rev. Sci. Instrum.* **2007**, *78*, 013705.

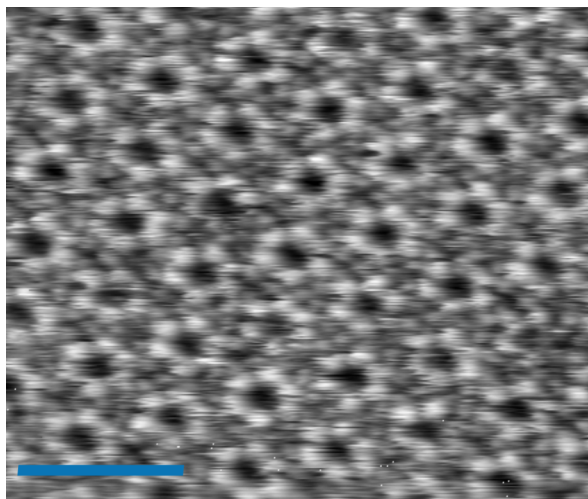

Fig. S3: STM image of the *shingle motif* structure at  $\sim 150$  K showing increased contrast of the less mobile ethyl groups (scale bar = 3 nm,  $U = 1.25$  V,  $I = 0.13$  nA).

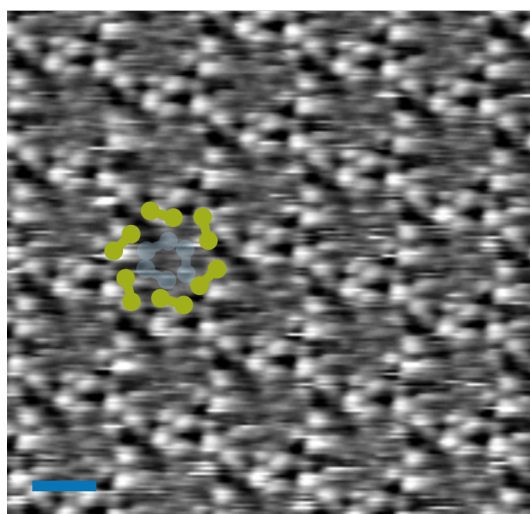

Fig. S4: STM image showing mobile central supramolecular trimers within the *windmill motifs* (scale bar = 2 nm,  $T = 290$  K,  $U = 1.49$  V,  $I = 0.13$  nA).

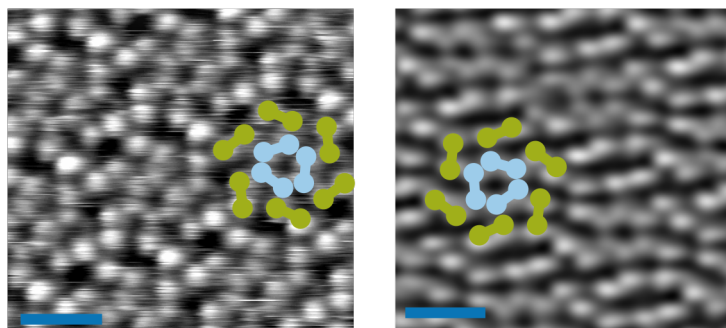

Fig. S5: STM images showing the organisational chirality in *windmill motif* domains. Left: *S*-domains (scale bar = 2 nm,  $T = 290$  K,  $U = 1.25$  V,  $I = 0.14$  nA). Right: *R*-domains (scale bar = 2 nm,  $T = 290$  K,  $U = 1.49$  V,  $I = 0.14$  nA).

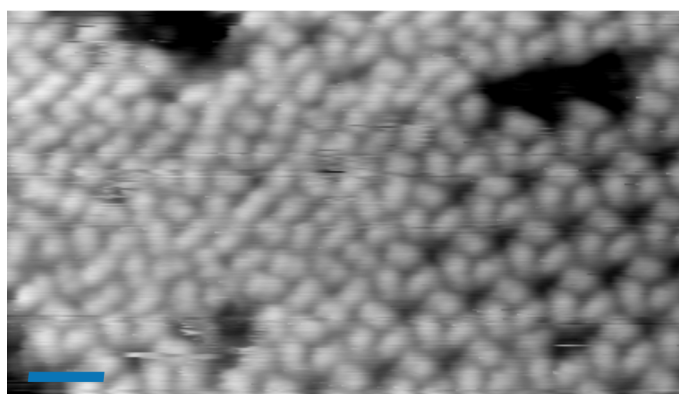

Fig. S6: STM image of DES on Cu(111) (scale bar = 2 nm,  $T \sim 173$  K,  $U = 2.67$  V,  $I = 0.16$  nA). The *star motif* (on the right) fades into a disordered arrangement of these elongated protrusions. If the sub-structure accounted for more than one molecule, one would also reasonably expect to identify smaller, separate protrusions of single molecules in a disordered phase.

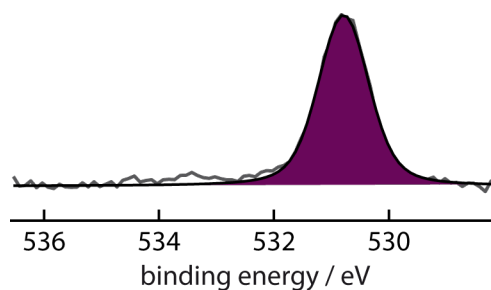

Fig. S7: O 1s signal of a submonolayer coverage of DES on Cu(111) after annealing to 400 K.
